# Supplementary material for: Synthetic peptides for the precise transportation of proteins of interests to selectable subcellular areas
Source: Front Bioeng Biotechnol. 2023 Feb 20;11:1062769. doi: 10.3389/fbioe.2023.1062769 (PMC9986269; doi:10.3389/fbioe.2023.1062769)
Supplement: Supplementary file 1 [file Table1.xlsx]

## Sheet: S Table.1 
F-RMN	5' GCATGGACGAGCTGTACAAGATGGAGCCCATGAGCAGAATGAC 3'
R-RMN	5' TTATGATCAGTTATCTAGATTCAAGGGTCCACCATTCTGCCCTGGCT 3'
F-RM1	5' GCATGGACGAGCTGTACAAGCCCGAGAGGTACATGGACATGTC 3'
R-RM1	5' TTATGATCAGTTATCTAGATTCACCTGCCCTGGGCGTCCATCCAC 3'
F-RM2	5' GCATGGACGAGCTGTACAAGCCCGAGAGATGGATGGATATGAG 3'
R-RM2	5' TTATGATCAGTTATCTAGATTCACCTGCCGTAATTGTCCATCCAC 3'
F-RM3	5' GCATGGACGAGCTGTACAAGCCTGAGAGATACATGGACATGTCCG 3'
R-RM3	5' TTATGATCAGTTATCTAGATTCATCTGCCGTGGGTGTCCATCCAC 3'
F-RM4	5' TTATGATCAGTTATCTAGATTCATCTGCCGTGGGTGTCCATCCAC 3'
R-RM4	5' TTATGATCAGTTATCTAGATTCATCTGCCGTAGTTGTCCATCCAG 3'
F-RM5	5' GCATGGACGAGCTGTACAAGCCCGAGAGACACATGGACATGAG 3'
R-RM5	5' TTATGATCAGTTATCTAGATTCATCTGCCCTGGTTGTCCATCCAT 3'

## Sheet: S Table.2
F-RLNto1	5' GCATGGACGAGCTGTACAAGATGAACAGATACCTGAACAGACAGAGAC 3'
R-RLNto1	5' TTATGATCAGTTATCTAGAT ATTGTCCATCCAGCCGCCGT 3'
F-RLNto2	5' GCATGGACGAGCTGTACAAGATGAACAGATACCTGAACAGACAGAGAC 3'
R-RLNto2	5' TTATGATCAGTTATCTAGATGCTGTCGAAGTGCCTGCTGG 3'
F-RLNto3	5' GCATGGACGAGCTGTACAAGATGAACAGATACCTGAACAGACAGAGAC 3'
R-RLNto3	5' TTATGATCAGTTATCTAGATGTGCTCCATGTGCCTGTTGTAGT 3'
F-RLNto4	5' GCATGGACGAGCTGTACAAGATGAACAGATACCTGAACAGACAGAGAC 3'
R-RLNto4	5' TTATGATCAGTTATCTAGATCTGGAACATGTTTCTGCCGTG 3'
F-RLNto5	5' GCATGGACGAGCTGTACAAGATGAACAGATACCTGAACAGACAGAGAC 3'
R-RLNto5	5' TTATGATCAGTTATCTAGATGTGGTTCATGTACCTGCCGTGG 3'

## Sheet: S Table.3
RM1*3+RL2*2
PERYMDMSGYQMDMQGRWMDAQGR-MNRYLNRQRLYNMYRNKYRGV-PERYMDMSGYQMDMQGRWMDAQGR- MNRYLNRQRLYNMYRNKYRGV- PERYMDMSGYQMDMQGRWMDAQGR- MNRYLNRQRLYNMYRNKYRGV- PERYMDMSGYQMDMQGRWMDAQGR
RMN+RM1*5
MNRYLNRQRLYNMYRNKYRGVMEPMSRMTMDFQGRYMDSQGRMVDPRYYDYYGRMHDHDRYYGRSMFNQGHSMDSQRYGGWMDNPERYMDMSGYQMDMQGRWMDAQGRFNNPFGQMWHGRQGHYPGYMSSHSMYGRNMYNPYHSHYASRHFDSPERYMDMSGYQMDMQGRWMDAQGRYVNPFNHHMYGRNMCYPYGNHYYNRHMEHPERYMDMSGYQMDMQGRWMDAQGRHCNPFGQMWHNRHGYYPGHPHGRNMFQPERYMDMSGYQMDMQGRWMDAQGRYVNPFSHNYGRHMNYPGGHYNYHHGRYMNHPERYMDMSGYQMDMQGRWMDAQGRYIDNFDRNYYDYHMY
